# Supplementary material for: Development of an Online Asynchronous Clinical Learning Resource (“Ask the Expert”) in Dental Education to Promote Personalized Learning
Source: MDPI journal article supplement (doi:10.3390/healthcare9111420), 2021-10-22
Supplement: s1 [file s1]



# CASE PRESENTATION

---

Student name:

Cohort:

# PATIENT DETAILS

---

- Initials: KFYY
- Gender: Female
- Age: 67 years old



# CHIEF CONCERN

---

# HISTORY OF PRESENTING CONCERN

---

# MEDICAL HISTORY

---

- Last medical check up:
- Medical condition:
- Medication:
- Allergies:
- Recent hospitalization:



# DENTAL HISTORY

---

# FAMILY HISTORY

---

# SOCIAL HISTORY

---



# EXTRAORAL EXAMINATION

---

- No facial asymmetry
- Smile line
- Temporomandibular joint:
- Lymph nodes:

# INTRAORAL EXAMINATION

---

- Soft tissues: WNL
- BPE:

2/0/2

2/2/2

# TOOTH CHARTING

Quadrant  
1

18:  
17:  
16:  
15:  
14:  
13:  
12:  
11:

21:  
22:  
23:  
24:  
25:  
26:  
27:  
28:

Quadrant  
2

Quadrant  
4

41:  
42:  
43:  
44:  
45:  
46:  
47:  
48:

38:  
37:  
36:  
35:  
34:  
33:  
32:  
31:

Quadrant  
3



# INTRAORAL VIEW

---

# FACIAL VIEW

---



# MAXILLARY OCCLUSAL VIEW

---



# MANDIBULAR OCCLUSAL VIEW

---

# BUCCAL VIEW

---

LEFT VIEW

RIGHT VIEW

# FACIAL VIEW (WITH DENTURES)

---



# MAXILLARY OCCLUSAL VIEW (WITH DENTURES)

---

# BUCCAL VIEW (WITH DENTURES)

---

LEFT VIEW

RIGHT VIEW

# CARIES RISK ASSESSMENT

- Total risk: Moderate

| E1 : RISK |  |
|-----------|--|
| High      |  |
| Moderate  |  |
| Low       |  |

| E2:RISK  |  |
|----------|--|
| High     |  |
| Moderate |  |
| Low      |  |

|            |  |
|------------|--|
| TOTAL RISK |  |
|------------|--|

| ELEMENT 1 : PATIENT LEVEL CARIES RISK FACTORS                                     |  | At RISK ( 1 = YES / 0 = No ) |
|-----------------------------------------------------------------------------------|--|------------------------------|
| Head and neck radiation                                                           |  | 0                            |
| Dry mouth (conditions, medications/recreational drugs/self-report)                |  | 0                            |
| Brushing less than two times a day and /or the use of non-fluoridated tooth paste |  | 0                            |
| Snacking on sugary diet more than 3 times/day                                     |  | 0                            |
| Symptomatic-driven dental attendance                                              |  | 1                            |
| Health access barriers                                                            |  | 0                            |

| ELEMENT 2: INTRAORAL LEVEL RISK FACTORS                                  |  | At RISK ( 1 = YES / 0 = No ) |
|--------------------------------------------------------------------------|--|------------------------------|
| Hypo-salivation/Gross indicators of dry mouth                            |  | 0                            |
| PUFA (Exposed pulp, Fistula, Abscess) – Dental sepsis                    |  | 0                            |
| Restorations in the past 2 years                                         |  | 0                            |
| Thick plaque: Evidence of sticky biofilm in plaque stagnation areas      |  | 1                            |
| Appliances, restorations and other causes of increased biofilm retention |  | 0                            |
| Exposed root surfaces                                                    |  | 0                            |



# TREATMENT PLAN

---

| DIAGNOSIS | TREATMENT PLAN |
|-----------|----------------|
|           |                |

# QUESTIONS

---





THANK YOU
