# Supplementary material for: Development of an Online Asynchronous Clinical Learning Resource (“Ask the Expert”) in Dental Education to Promote Personalized Learning
Source: Healthcare (Basel). 2021 Oct 22;9(11):1420. doi: 10.3390/healthcare9111420 (PMC8624543; doi:10.3390/healthcare9111420)
Supplement: Supplementary file 1 [file healthcare-09-01420-s001.zip]

Archive with 5 entries (5 files):
- Figure S1.pdf
- Figure S2.jpg
- Figure S3.jpg
- Figure S4.jpg
- Figure S5.pdf
